# Supplementary material for: Heritability of circle of Willis variations in families with intracranial aneurysms
Source: PLoS One. 2018 Jan 29;13(1):e0191974. doi: 10.1371/journal.pone.0191974 (PMC5788367; doi:10.1371/journal.pone.0191974)
Supplement: S2 File — (XLSX) [file pone.0191974.s002.xlsx]

## Sheet: Blad1
Family number	Index	Sex	IA (probable or definite phenotype)	SAH history	A1 asymmetry	incomplete PcomA	Fetal posterior circulation	Classical configuration
3	1	M	0	0	0	1	0	0
3	0	F	0	0	1	1	0	0
4	1	M	0	0	0	1	0	0
4	0	F	0	0	0	1	0	0
8	1	M	0	0	0	1	0	0
8	0	M	0	0	0	1	0	0
11	1	F	0	0	0	1	1	0
11	0	F	0	0	0	1	0	0
11	0	F	0	0	0	1	0	0
11	0	F	0	0	1	1	0	0
11	0	M	0	0	1	1	1	0
16	1	F	0	0	1	1	0	0
16	0	M	0	0	0	1	1	0
16	1	F	1	0	0	1	0	0
16	0	M	0	0	0	1	0	0
16	0	M	0	0	0	1	0	0
16	0	M	0	0	1	1	0	0
16	0	F	0	0	0	1	1	0
17	1	M	0	0	0	1	0	0
17	0	F	0	0	0	1	1	0
20	1	F	0	0	0	1	0	0
20	0	F	0	0	1	1	0	0
31	1	F	0	0	0	1	0	0
31	0	F	0	0	0	0	0	1
31	0	F	0	0	0	1	0	0
31	1	F	0	0	0	1	0	0
31	0	F	0	0	0	1	0	0
34	1	F	0	0	0	1	0	0
34	0	F	1	0	1	0	0	0
37	1	M	0	0	1	1	0	0
37	0	M	0	0	0	1	0	0
42	1	F	0	0	0	0	0	1
42	0	F	0	0	0	1	0	0
42	0	F	0	0	1	1	0	0
42	0	M	0	0	0	0	1	0
42	0	M	0	0	0	0	1	0
42	0	F	0	0	0	0	1	0
43	1	M	0	0	1	1	0	0
43	0	M	0	0	0	1	0	0
52	1	F	0	0	0	1	0	0
52	0	F	0	0	0	0	1	0
63	1	F	0	0	1	1	0	0
63	0	M	0	0	0	1	0	0
63	0	M	1	0	0	1	0	0
65	1	M	0	0	0	1	1	0
65	0	F	0	0	1	1	0	0
67	1	F	0	0	0	1	0	0
67	0	M	0	0	0	1	0	0
69	1	F	0	0	0	0	0	1
69	0	F	0	0	0	1	0	0
69	0	F	0	0	0	1	0	0
72	0	F	1	0	1	1	0	0
72	0	M	1	0	0	1	0	0
72	0	M	0	0	0	1	0	0
72	1	F	0	0	0	1	0	0
72	0	F	1	0	0	1	0	0
74	1	F	0	0	0	1	0	0
74	0	M	0	0	0	0	0	1
74	0	M	0	0	1	1	0	0
76	1	M	0	0	0	1	0	0
76	0	M	0	0	1	1	0	0
80	1	F	0	0	0	0	0	1
80	0	F	0	0	1	1	0	0
80	1	F	1	0	0	0	1	0
80	0	F	0	0	0	0	0	1
82	1	F	0	0	0	0	0	1
82	0	M	0	0	0	0	1	0
83	1	F	0	0	0	1	1	0
83	0	F	0	0	0	0	0	1
86	1	F	1	0	1	0	0	0
86	0	F	0	0	0	0	1	0
86	1	F	0	0	0	1	0	0
86	0	F	0	0	0	1	0	0
86	1	F	0	0	0	1	0	0
86	0	M	0	0	0	0	0	1
95	1	F	0	0	0	1	0	0
95	0	F	0	0	0	1	0	0
95	0	M	0	0	0	1	0	0
95	0	M	0	0	0	1	0	0
95	0	M	0	0	0	1	0	0
98	1	M	0	0	1	1	1	0
98	0	M	1	0	0	1	0	0
99	1	F	1	0	0	1	0	0
99	0	M	0	0	0	1	0	0
112	1	F	1	0	0	0	0	1
112	0	F	0	0	1	0	0	0
112	0	F	1	1	1	0	0	0
118	1	F	1	0	0	1	1	0
118	0	F	1	0	1	1	0	0
118	0	F	0	0	0	1	0	0
121	1	F	1	0	0	1	1	0
121	0	M	0	0	0	0	0	1
124	1	F	0	0	0	0	0	1
124	0	F	1	0	1	1	0	0
125	1	F	0	0	0	0	1	0
125	0	F	0	0	0	0	1	0
130	1	F	1	0	0	0	1	0
130	0	M	0	0	1	1	0	0
130	0	F	1	0	0	1	0	0
133	1	M	0	0	0	0	0	1
133	0	M	0	0	0	1	0	0
138	1	F	1	0	0	1	0	0
138	0	F	0	0	0	0	1	0
138	0	M	0	0	0	0	0	1
141	1	M	0	0	0	0	1	0
141	0	F	0	0	0	1	0	0
145	1	M	0	0	0	1	0	0
145	0	M	0	0	0	1	0	0
406	1	F	0	0	0	0	1	0
406	0	F	0	0	0	0	0	1
410	1	F	0	0	0	0	0	1
410	0	F	0	0	0	0	1	0
410	1	F	0	0	0	1	0	0
410	0	F	0	0	1	1	0	0
427	1	M	0	0	1	1	0	0
427	0	F	0	0	0	1	0	0
445	1	F	0	0	0	1	0	0
445	0	F	0	0	0	1	0	0
455	1	M	0	0	0	0	0	1
455	0	M	0	0	0	0	1	0
519	1	M	0	0	1	0	1	0
519	0	F	0	0	1	0	1	0
519	0	F	0	0	0	0	0	1
519	1	M	0	0	0	0	0	1
519	0	M	0	0	0	1	0	0
525	1	F	0	0	0	1	0	0
525	0	F	0	0	0	1	1	0
533	1	F	0	0	0	1	0	0
533	0	M	0	0	0	0	0	1
533	0	F	0	0	0	0	0	1
707	1	M	0	0	0	0	0	1
707	0	M	0	0	0	1	0	0
713	1	F	0	0	0	1	1	0
713	0	F	0	0	0	0	0	1
803	1	F	1	0	0	1	0	0
803	1	F	0	0	0	1	0	0
803	0	F	0	0	0	1	0	0
803	0	F	0	0	0	1	1	0
805	1	M	0	0	1	0	0	0
805	0	F	0	0	0	0	0	1
807	1	F	0	0	0	1	0	0
807	0	F	0	0	1	0	1	0
808	1	M	0	0	0	0	1	0
808	0	F	0	0	1	0	1	0
812	1	F	1	0	0	1	0	0
812	0	M	0	0	0	1	0	0
812	0	M	0	0	1	0	1	0
812	0	F	0	0	0	1	0	0
820	1	F	0	0	1	1	1	0
820	0	M	0	0	0	0	1	0
821	1	F	0	0	1	1	0	0
821	0	F	0	0	1	1	1	0
822	1	F	1	0	0	1	1	0
822	0	F	0	0	0	1	0	0
904	1	M	0	0	0	1	0	0
904	0	F	0	0	0	1	0	0
907	1	M	0	0	0	1	0	0
907	0	M	0	0	0	1	0	0
1002	1	F	1	0	1	1	0	0
1002	0	F	0	0	0	1	0	0
1003	1	F	0	0	0	1	0	0
1003	0	F	0	0	0	0	0	1
1011	1	M	0	0	0	0	0	1
1011	0	M	0	0	0	0	0	1
1011	0	M	0	0	0	1	0	0
1012	1	F	0	0	1	1	0	0
1012	0	M	0	0	0	1	0	0
1012	0	F	0	0	1	1	0	0
1012	0	M	0	0	1	1	0	0
1012	0	M	0	0	1	1	0	0
1012	0	F	0	0	1	1	0	0
1012	0	F	0	0	1	1	0	0
1013	1	F	0	0	0	1	0	0
1013	0	M	0	0	0	1	1	0
1014	1	F	0	0	0	1	0	0
1014	0	F	0	0	1	1	1	0
1016	1	F	0	0	0	1	1	0
1016	0	M	0	0	0	0	1	0
1019	1	M	0	0	0	0	0	1
1019	0	F	0	0	1	0	0	0
1019	0	M	0	0	0	1	0	0
1019	0	F	0	0	0	0	0	1
1019	1	M	0	0	0	0	0	1
1019	0	F	0	0	0	1	0	0
1022	1	M	0	0	0	0	1	0
1022	0	M	0	0	1	1	0	0
1026	1	F	0	0	0	1	0	0
1026	0	F	0	0	0	1	0	0
1026	0	F	0	0	0	0	0	1
1026	0	M	0	0	0	0	1	0
1026	0	M	0	0	1	0	1	0
1026	0	M	0	0	0	1	0	0
1033	1	F	1	0	0	0	0	1
1033	0	M	0	0	0	1	1	0
1101	1	F	0	0	1	0	1	0
1101	0	F	0	0	0	1	1	0
1102	1	F	0	0	0	0	0	1
1102	0	F	0	0	1	0	1	0
1102	0	F	0	0	0	1	0	0
1102	0	F	0	0	0	1	0	0
1102	0	M	0	0	0	1	0	0
1102	1	F	1	0	0	1	0	0
1102	0	F	0	0	0	0	0	1
1103	1	F	1	0	0	1	0	0
1103	0	M	1	0	0	1	0	0
1103	0	M	0	0	0	0	1	0
1104	1	F	0	0	0	1	0	0
1104	0	F	0	0	0	0	0	1
1104	0	M	0	0	0	1	0	0
1104	0	F	0	0	0	0	0	1
1104	0	F	0	0	0	0	1	0
1114	1	F	1	0	0	0	1	0
1114	0	F	0	0	0	0	0	1
1114	0	F	0	0	0	1	0	0
1151	1	F	0	0	0	0	1	0
1151	0	F	0	0	1	0	0	0
1164	1	M	0	0	1	1	1	0
1164	0	F	0	0	0	1	0	0
1164	0	F	0	0	0	1	0	0
1164	0	M	0	0	1	0	1	0
1165	1	F	0	0	0	1	0	0
1165	0	F	0	0	0	1	0	0
1165	0	M	0	0	0	1	0	0
1165	0	M	0	0	0	1	0	0
1165	0	F	0	0	0	1	1	0
1165	0	M	0	0	0	1	0	0
1168	1	M	0	0	0	1	0	0
1168	0	F	0	0	0	1	0	0
1168	0	F	0	0	0	1	0	0
1181	1	F	0	0	0	0	0	1
1181	0	M	0	0	0	1	0	0
1183	1	M	0	0	0	1	0	0
1183	0	M	0	0	0	0	1	0
1184	1	F	0	0	1	1	0	0
1184	0	F	0	0	0	1	0	0
1184	0	M	0	0	0	1	0	0
1189	1	M	0	0	0	0	0	1
1189	0	M	0	0	0	0	0	1
1192	1	M	0	0	0	1	0	0
1192	0	F	1	0	0	1	0	0
1195	1	M	0	0	0	0	1	0
1195	0	F	0	0	0	1	0	0
1195	0	M	0	0	0	0	1	0
1196	1	F	0	0	0	1	0	0
1196	0	M	0	0	0	1	0	0
1200	1	F	1	0	0	1	0	0
1200	0	M	0	0	0	1	0	0
1202	1	M	0	0	0	1	0	0
1202	0	M	0	0	0	1	0	0
1204	1	F	0	0	0	1	0	0
1204	0	F	0	0	1	0	1	0
1215	1	F	0	0	0	0	1	0
1215	0	F	0	0	1	1	0	0
1220	1	M	0	0	0	1	0	0
1220	0	F	0	0	1	0	0	0
1222	1	F	0	0	0	0	0	1
1222	0	M	0	0	0	1	0	0
1236	1	F	0	0	0	1	0	0
1236	0	M	0	0	1	1	0	0
1237	1	M	0	0	0	1	0	0
1237	0	F	0	0	0	0	1	0
1303	1	M	0	0	1	0	1	0
1303	0	M	0	0	1	0	1	0
1303	1	F	0	0	0	1	0	0
1303	0	F	0	0	0	1	0	0
1503	1	F	0	0	0	0	1	0
1503	0	M	0	0	1	1	0	0
1503	0	M	0	0	0	1	0	0
1507	1	F	0	0	0	1	0	0
1507	0	M	0	0	0	0	1	0
1507	0	F	0	0	1	1	0	0
1514	1	M	0	0	0	0	0	1
1514	0	M	0	0	0	1	0	0
1514	0	F	0	0	0	0	0	1
1514	0	F	0	0	0	1	0	0
1701	1	M	0	0	1	1	0	0
1701	0	M	0	0	0	1	0	0
1703	1	F	0	0	0	0	0	1
1703	0	M	0	0	0	0	0	1
1705	1	M	0	0	1	0	0	0
1705	0	M	0	0	1	1	0	0
1711	1	F	0	0	0	0	0	1
1711	0	F	0	0	0	0	0	1
1860	1	M	1	0	0	0	0	1
1860	0	M	0	0	0	0	0	1
2001	1	M	0	0	0	1	1	0
2001	0	F	0	0	0	1	1	0
2001	0	M	0	0	0	1	0	0
2203	1	M	0	0	0	1	0	0
2203	0	M	0	0	0	1	0	0
2409	1	M	1	1	0	0	0	1
2409	0	M	0	0	0	0	1	0
3685	1	M	0	0	0	1	0	0
3685	0	F	1	0	0	0	1	0
3686	1	F	1	0	0	0	0	1
3686	1	M	0	0	1	1	0	0
3686	0	M	1	0	0	1	0	0
3686	0	M	0	0	0	1	0	0
3691	1	M	0	0	1	1	0	0
3691	0	M	0	0	0	1	1	0
3691	0	F	0	0	0	0	0	1
3693	1	F	0	0	0	1	1	0
3693	0	F	0	0	0	1	0	0
3693	1	M	0	0	0	1	1	0
3693	0	M	0	0	0	1	0	0
5201	1	F	0	0	0	0	0	1
5201	0	F	0	0	0	1	0	0
5201	0	F	0	0	1	1	0	0
5201	0	F	0	0	0	0	0	1
5201	0	F	0	0	0	1	0	0
